# Supplementary material for: Discovery of a Novel Human Pegivirus in Blood Associated with Hepatitis C Virus Co-Infection
Source: PubMed Central journal article supplement (PMC4676677; doi:10.1371/journal.ppat.1005325), 2015-12-11
Supplement: ppat.1005325.s001.pdf [file ppat.1005325.s001.pdf]

**S1 Table. Detection of HPgV-2 and HPgV-1 RNA**

| Group                            | HPgV-2 RNA positive (%) | HPgV-1 RNA positive (%) | P-values by McNemar's test |
|----------------------------------|-------------------------|-------------------------|----------------------------|
| HCV Ab+/NAT+ (n=742*)            | 10 / 742<br>(1.5%)      | 71 / 742<br>(9.5%)      | <0.0001                    |
| HCV Ab-/NAT+ (n=240)             | 1 / 240<br>(0.4%)       | NT                      | NA                         |
| HIV (n=494)*                     | 1 / 240<br>(0.4%)       | 58 / 475<br>(12.2%)     | <0.0001                    |
| HBV (n=488)                      | 0 / 488<br>(0%)         | 9 / 488<br>(1.8%)       | 0.0027                     |
| volunteer blood donors (n=476)** | 0 / 476<br>(0%)         | 19 / 452<br>(4.2%)      | <0.0001                    |

Abbreviations: NT, not tested; NA, not applicable.

\* Two samples were co-infected with HIV and HCV: these two samples were grouped with the HCV Ab+ / PCR+ group

\*\* All volunteer donor samples tested negative for HBV, HCV, and HIV.
