# Supplementary material for: Discovery of a Novel Human Pegivirus in Blood Associated with Hepatitis C Virus Co-Infection
Source: PubMed Central journal article supplement (PMC4676677; doi:10.1371/journal.ppat.1005325), 2015-12-11
Supplement: ppat.1005325.s002.pdf [file ppat.1005325.s002.pdf]

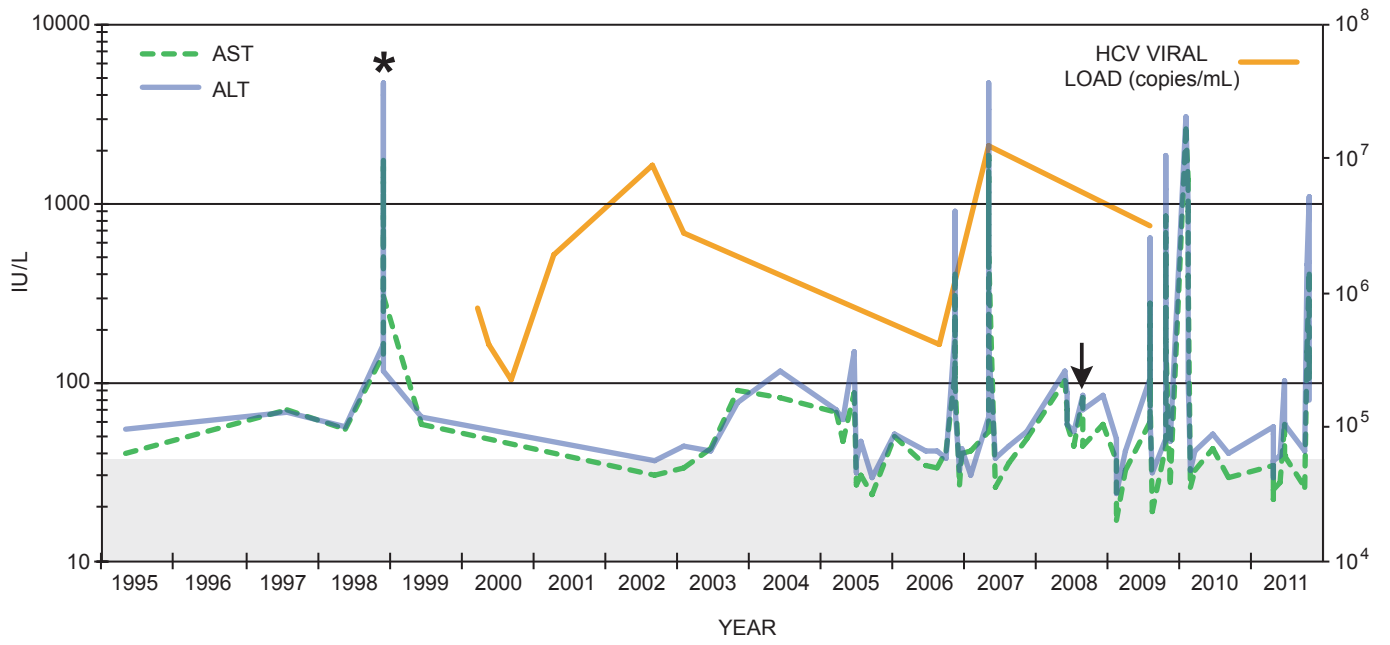

S1 Figure. Clinical parameters for the HPgV-2 positive index patient (UC0125.US).
