# Supplementary material for: Discovery of a Novel Human Pegivirus in Blood Associated with Hepatitis C Virus Co-Infection
Source: PubMed Central journal article supplement (PMC4676677; doi:10.1371/journal.ppat.1005325), 2015-12-11
Supplement: ppat.1005325.s005.pdf [file ppat.1005325.s005.pdf]

A

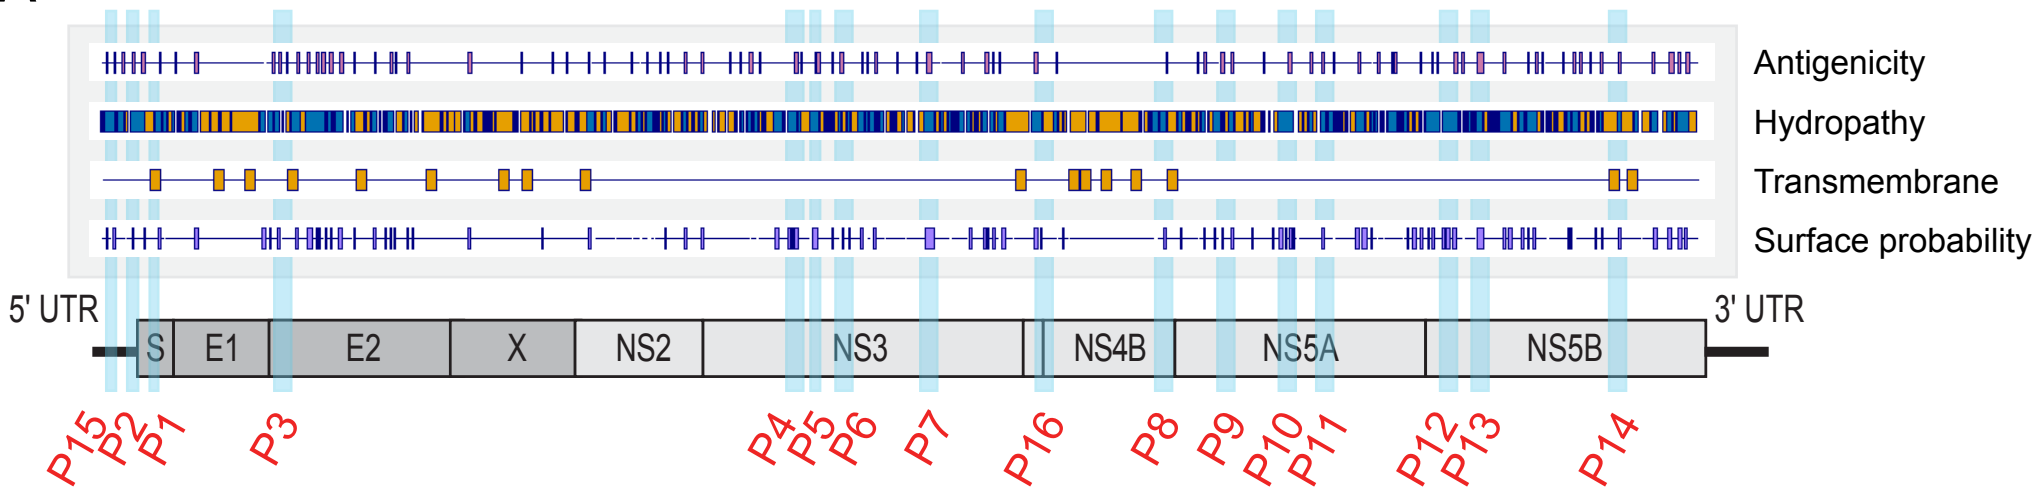

B

| Peptide # | Protein      | Sequence                                           | % homology with HCV | % homology with GBV-C |
|-----------|--------------|----------------------------------------------------|---------------------|-----------------------|
| 1         | S            | GGSCRSPSRVQVARRVLQLSAFLALIGSGMSSIRSKTEGRIESGQ      | 8.9%                | 13.3%                 |
| 2         | S            | RDGSLHWSHARHHSVQPDRVAAGPPSVTSVERNMGSSTDQT          | 17.0%               | 12.1%                 |
| 3         | E2           | SMNSDSPFGTFTRNTESRFSIPRFSPVKINS                    | 9.5%                | 12.9%                 |
| 4         | NS3          | QAPAVTPTYSEITYYAPTGSGKSTKYPVDLVKQGHKVLVL           | 57.5%               | 37.5%                 |
| 5         | NS3          | VKSMAPYIKETYKIRPEIRAGTGPDGVTVITG                   | 25.0%               | 31.2%                 |
| 6         | NS3          | PETNLRGYAVVISDESHDTSS                              | 42.8%               | 61.8%                 |
| 7         | NS3          | PCTAALRMQRRGRTGRGRRGAYTTSPGAAPCVS                  | 44.1%               | 58.8%                 |
| 8         | NS4B         | LSEFRGQQLSKLSLWRSVYHWAQAREGYTQCG                   | 18.7%               | 25.0%                 |
| 9         | NS5A         | NPTTTGTGLRPDISDANKLGFYGVADIVELERRGDKWH             | 27.5%               | 15.0%                 |
| 10        | NS5A         | QNLAARRRAEYDAWQVRQAVGDEYRLADEDVD                   | 6.1%                | 6.1%                  |
| 11        | NS5A         | RFVPPVPKPRTRVSGVLERVRMCMRTPPIKF                    | 6.5%                | 12.9%                 |
| 12        | NS5B         | NTTRDHNNGITYTDLVSGRAKP                             | 9.0%                | 13.6%                 |
| 13        | NS5B         | DAPMRIIPKPEVFPDRDKSTRKPPRFIVFPGCAARV               | 34.3%               | 40.0%                 |
| 14        | NS5B         | MPLLCMLIRNEPSQTGLVT                                | 10.0%               | 10.0%                 |
| 15        | S + upstream | AEAAPKSGELDSQCDHLAWSFMEGMPTGTLIVQRDGLSH            | 2.6%                | 0.0%                  |
| 16        | NS4A-B       | SVEVRPAGVTRPDATDETAAYAQRLYQACADSGIFASLQGTASAALGKLA | 12.0%               | 20.0%                 |

**S4 Figure. Indices for HPgV-2 polyprotein analysis and peptides for detection of HPgV-2 specific antibody.**
