# Supplementary material for: Discovery of a Novel Human Pegivirus in Blood Associated with Hepatitis C Virus Co-Infection
Source: PubMed Central journal article supplement (PMC4676677; doi:10.1371/journal.ppat.1005325), 2015-12-11
Supplement: ppat.1005325.s006.pdf [file ppat.1005325.s006.pdf]

### Peptide 4 (NS3)

|                                                                                     | S/CO |
|-------------------------------------------------------------------------------------|------|
| 125 Q A P A V T P T Y S E I T Y Y A P T G S G K S T K Y P V D L V K Q G H K V L V L | 0.9  |
| 29 Q A P A V T P T Y S E I T Y Y A P T G S G K S T K Y P V D L V K Q G H K V L V I  | -    |
| 30 Q A P A V T P T Y S E I T Y Y A P T G S G K S T K Y P V D L V K Q G H K V L V L  | -    |
| 35 Q A P A V T P T Y S E I T Y Y A P T G S G K S T K Y P V D L V K Q G H K V L V L  | -    |
| 41 Q A P A V T P T Y S E I T Y Y A P T G S G K S T K Y P V D L V K Q G H K V L V L  | -    |
| 55 Q A P A V T P T Y S E I T Y Y A P T G S G K S T K Y P V D L V K Q G H K V L V I  | -    |
| 70 Q A P A V T P T Y S E I T Y Y A P T G S G K S T K Y P V D L V K Q G H K V L V L  | -    |
| 96                                                                                  | 2.3  |
| 128 Q A P A V T P T Y S E I T Y Y A P T G S G K S T K Y P V D L V K Q G H K V L V L | -    |
| 239 Q A P A V T P T Y S E I T Y Y A P T G S G K S T K Y P V D L V K Q G H K V L V I | -    |
| 116 Q A P A V T P T Y S E I T Y Y A P T G S G K S T K Y P V D L V K Q G H K V L V L | -    |
| 118 Q A P A V T P T Y S E I T Y Y A P T G S G K S T K Y P V D L V K Q G H K V L V L | -    |

### Peptide 9 (NS5A)

|                                                                                     | S/CO |
|-------------------------------------------------------------------------------------|------|
| 125 N P T T T G T G T L R P D I S D A N K L G F R Y G V A D I V E L E R R G D K W H | 6.5  |
| 29 N P T T T A T G T L R P D I S D A T R L G F R Y G I A E I V E L E L R E H K W H  | 0.8  |
| 30 N P T T T A T G T L R P D I S D A T K L G F R Y G V A E I V E L E W R D N K W H  | -    |
| 35 N P T T T A T G T L R P D I G D A T R L G F R Y G I A E I V E L E W R G D K W H  | -    |
| 41 N P T T T A T G T L R P D I G D A T R L G F R Y G I A E I V E L E R R G D K W H  | -    |
| 55 N P T T T A T G T L R P D I X X A T K L G F R Y G V A D I V E L E X R G D K W H  | -    |
| 70 N P T T T A T G T L R P D I S D A T K L G F R Y G V A E I V E L E R R G N K W H  | 3.5  |
| 96 N P T T P A T G T L R X D I S D D S K L G F L Y C V A D I V D L E . R R D K W H  | 6.0  |
| 128 N P T T T A T G T L R P D I S D A T K L G F R Y G V A D I V E L E W R G D K W H | 4.6  |
| 239 N P T T T A T G N L R P D I S D A T K L G F R Y G I A E I V E L E R R G D K W H | -    |
| 116 N P T T T A T G T L R P D I S D A T K L G F R Y G V A E I V E L E R R D N K W H | 25.5 |
| 118 N P T T T A T G T L R P D I S D A T K L G F R Y G V A E I V E L E R R G D K W H | -    |

### Peptide 16 (NS4A-B junction)

|                                                                                                         | S/CO |
|---------------------------------------------------------------------------------------------------------|------|
| 125 S V E V R P A G V T R P D A T D E T A A Y A Q R L Y Q A C A D S G I F A S L Q G T A S A A L G K L A | 13.0 |
| 29 S V D N G V A G V T R P D A T D E T A A Y A Q R L Y Q A C A D S G L L A S L Q G T A S A A L S K L A  | 1.9  |
| 30 S V D N G P A G V T R P D A T D E T A A Y A Q R L Y Q A C A D S G I L A S L Q G T A C A A L S K L A  | -    |
| 35 S V D N G P T G V T R P D A T D E T V A Y A Q R L Y H A C A D S G I L A S L Q G T A C A A L S K L A  | -    |
| 41 S V D N G P T G V T R P D A T D E T V A Y A Q R L Y H A C A D S G I L A S L Q G T A C A A L S K L A  | -    |
| 55                                                                                                      | 1.0  |
| 70 S V E N G L A G V T R P D A T D E T A A Y A Q R L Y Q A C A D S G I L A S L Q G T A S A A L S R L A  | 0.7  |
| 96                                                                                                      | 13.8 |
| 128 S V D N G L A G V T R P D A T D E T A A Y A Q R L Y Q A C A D S G I F A S L Q G A A S A A L S R L A | 1.6  |
| 239 S V D N G L A G V T R P D A T D E T A A Y A Q R L Y Q A C A D S G L F A S L Q G T A S A A L G K L A | -    |
| 116 S V E N G L A G V T R P D A T D E T A A Y A Q R L Y Q A C A D S G I L A S L Q G T A S A A L S R L A | 26.7 |
| 118 S V E N G P A G V T R P H A T D E T A A Y A Q R L Y Q A C A D S G I L A S L Q G T A C A A L S R L A | 24.8 |

Supplementary Figure 5. Alignments of HPgV-2 peptides used in the serological assay
